# Supplementary material
Source: PubMed Central journal article supplement (PMC7936855)
Supplement: NIHMS1664281-supplement-6.pdf [file NIHMS1664281-supplement-6.pdf]

**Oligonucleotides and FISH probe used in the study, related to Figures 1-3.**

| Target (ID)                                | Forward primer (5' to 3')                              | Reverse primer (5' to 3')                              | Source                            | Identifier |
|--------------------------------------------|--------------------------------------------------------|--------------------------------------------------------|-----------------------------------|------------|
| <i>C. albicans</i> (qPCR)                  | TTT ATC AAC TTG TCA CAC CAG A                          | ATC CCG CCT TAC CAC TAC CG                             | Integrated DNA Technologies (IDT) | N/A        |
| <i>S. cerevisiae</i> (qPCR)                | AGG AGT GCG GTT CTT TG                                 | TAC TTA CCG AGG CAA GCT ACA                            | Integrated DNA Technologies (IDT) | N/A        |
| Fungi (18S, qPCR)                          | GGRAAACTCACCAGGTCCAG                                   | GSWCTATCCCCAKCACGA                                     | Liu et al., 2012                  | N/A        |
| Bacteria (16S, qPCR)                       | AGAGTTTGATCMTGGCTCAG                                   | CTGCTGCCTYCCGTA                                        | Integrated DNA Technologies (IDT) | N/A        |
| Mouse <i>Rp32</i> (qPCR)                   | AAG CGA AAC TGG CCG AAA C                              | TAA CCG ATG TTG GGC ATC AG                             | Integrated DNA Technologies (IDT) | N/A        |
| Fungal (ITS1-2-next generation sequencing) | TCGTCGGCAGCGTCAGATGTGTATAAGAGACAGCTTGGTCATTAGAGGAAGTAA | GTCTCGTGGGCTCGGAGATGTGTATAAGAGACAGGCTGCGTTCTTCATCGATGC | Integrated DNA Technologies (IDT) | N/A        |
| 16S rRNA Eubacteria Probe EUB338 (FISH)    | /5Cy5/GCT GCC TCC CGT AGG AGT                          | N/A                                                    | Daims et al., 1999                | N/A        |
