# Supplementary material
Source: PubMed Central journal article supplement (PMC7936855)

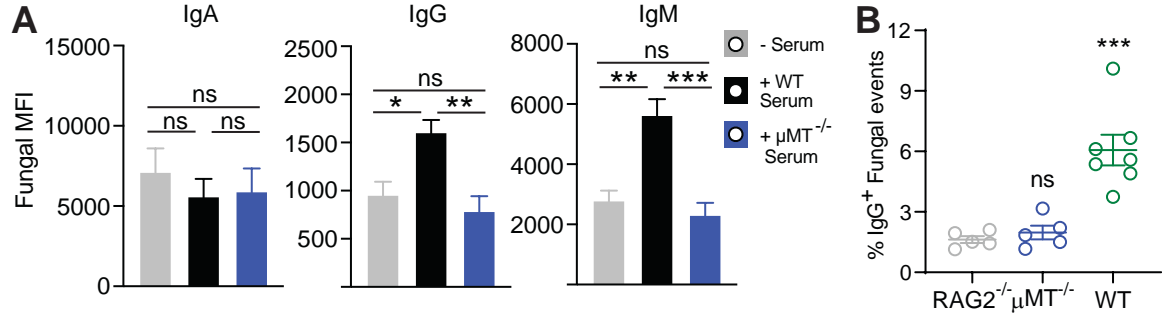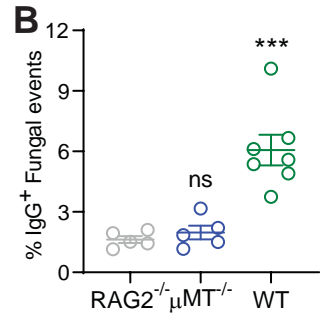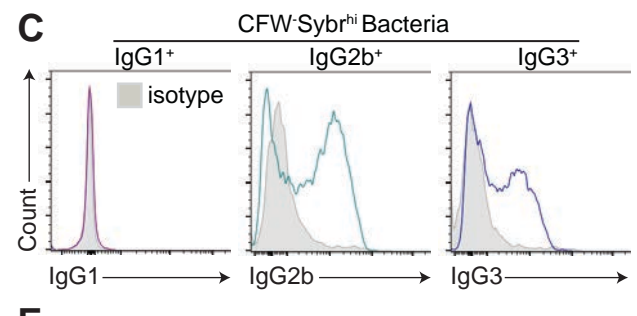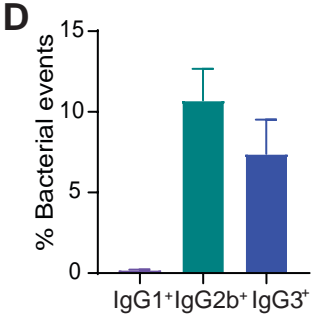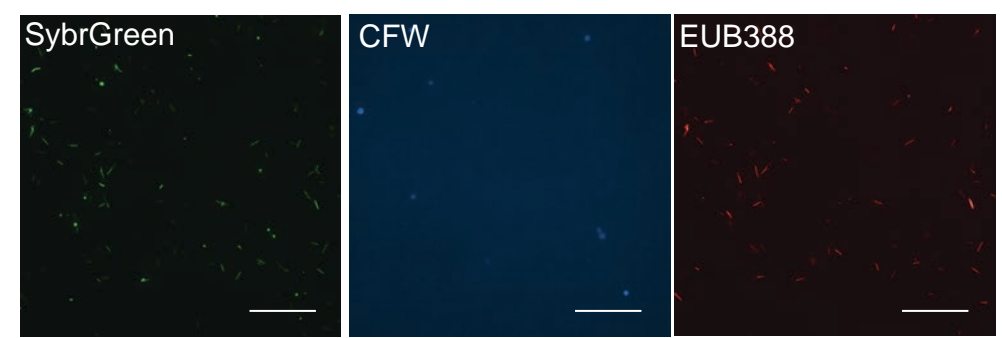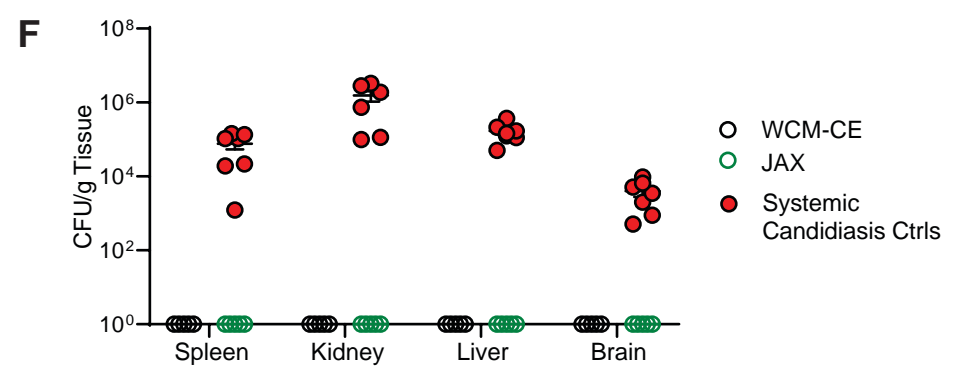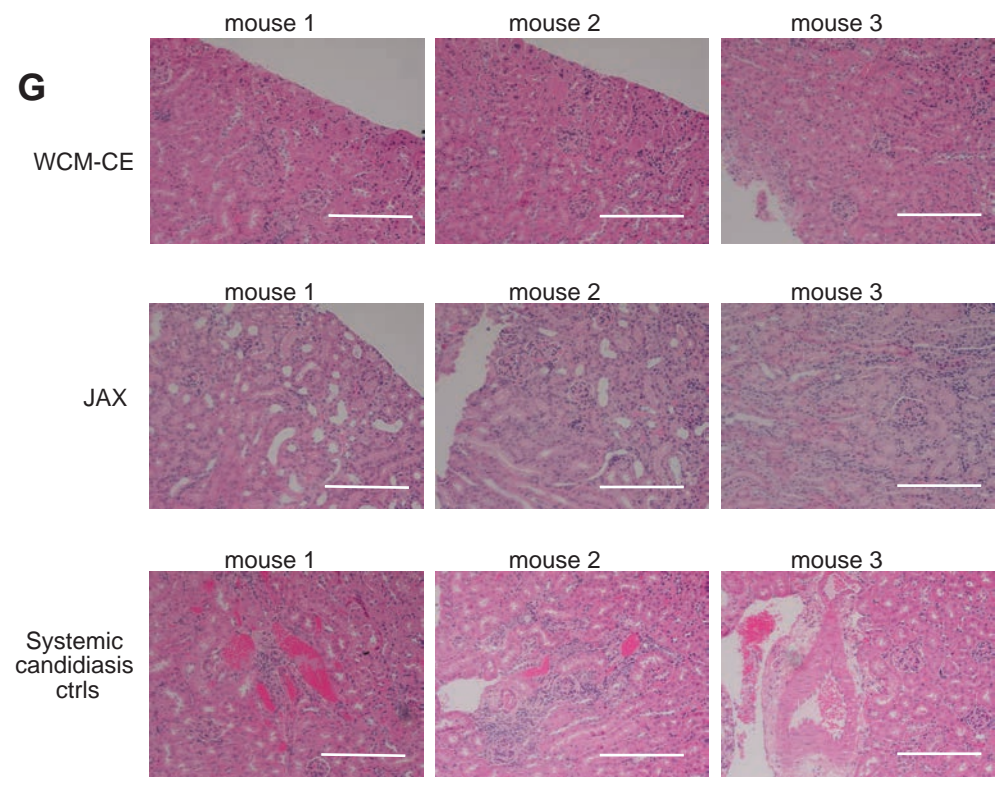

Supplement: NIHMS1664281-supplement-1.pdf [file NIHMS1664281-supplement-1.pdf]

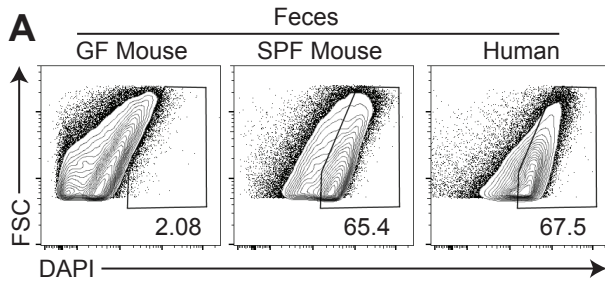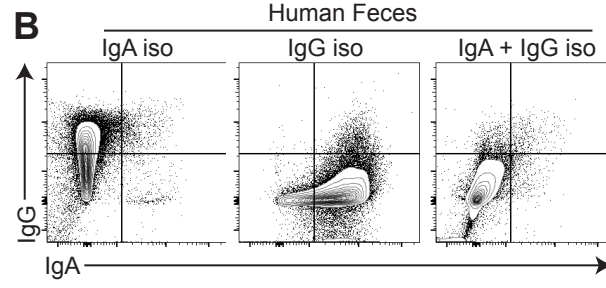

**C**

$$\text{Coating Index} = -\left(\frac{\log_{10}[\text{Ig}^+] - \log_{10}[\text{Ig}^-]}{\log_{10}[\text{Ig}^+] + \log_{10}[\text{Ig}^-]}\right)$$

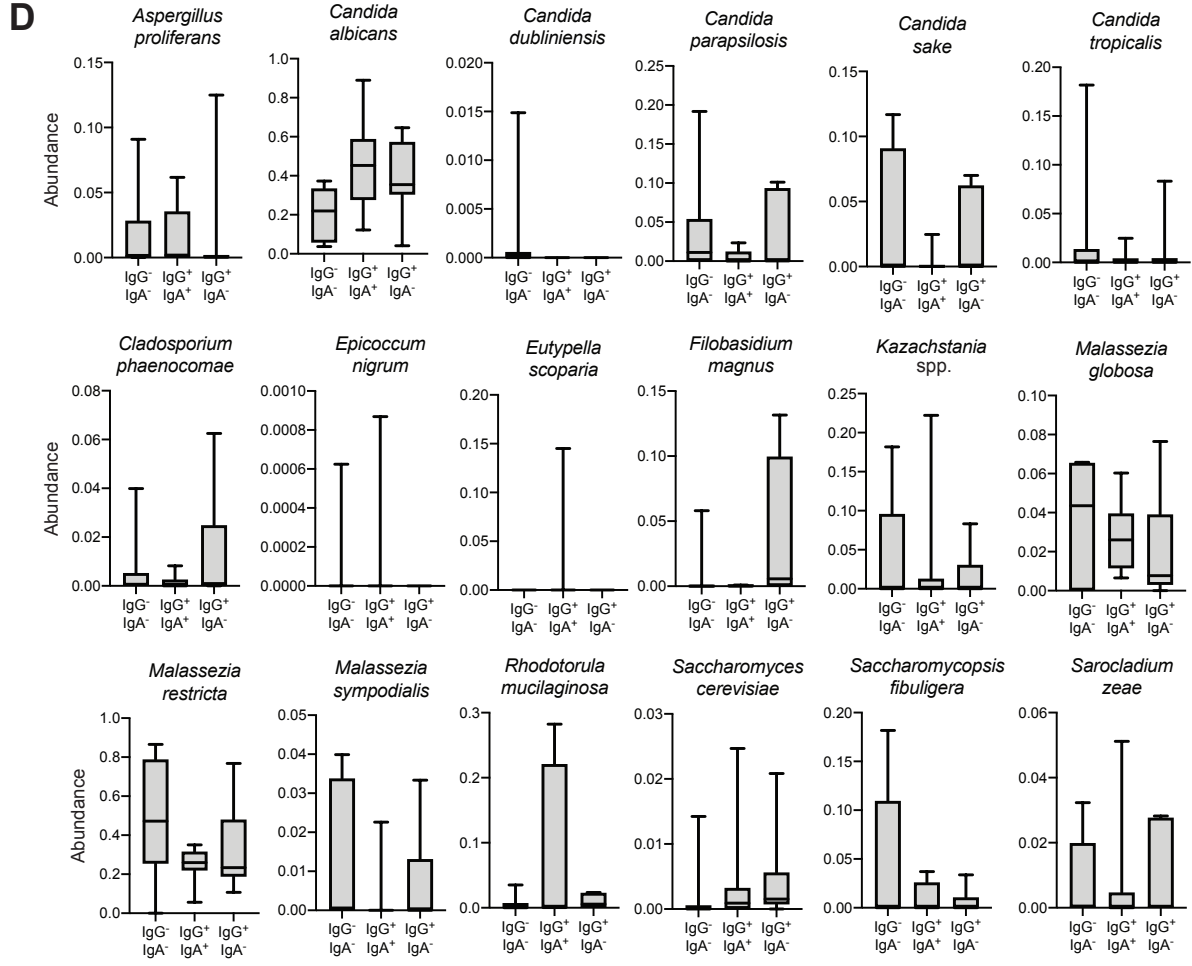

Supplement: NIHMS1664281-supplement-2.pdf [file NIHMS1664281-supplement-2.pdf]

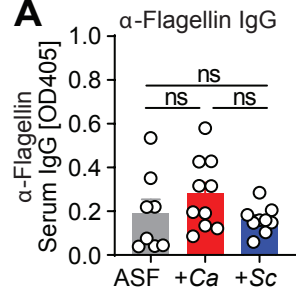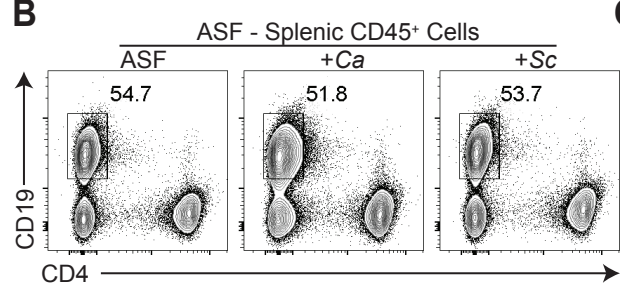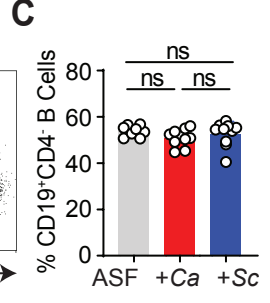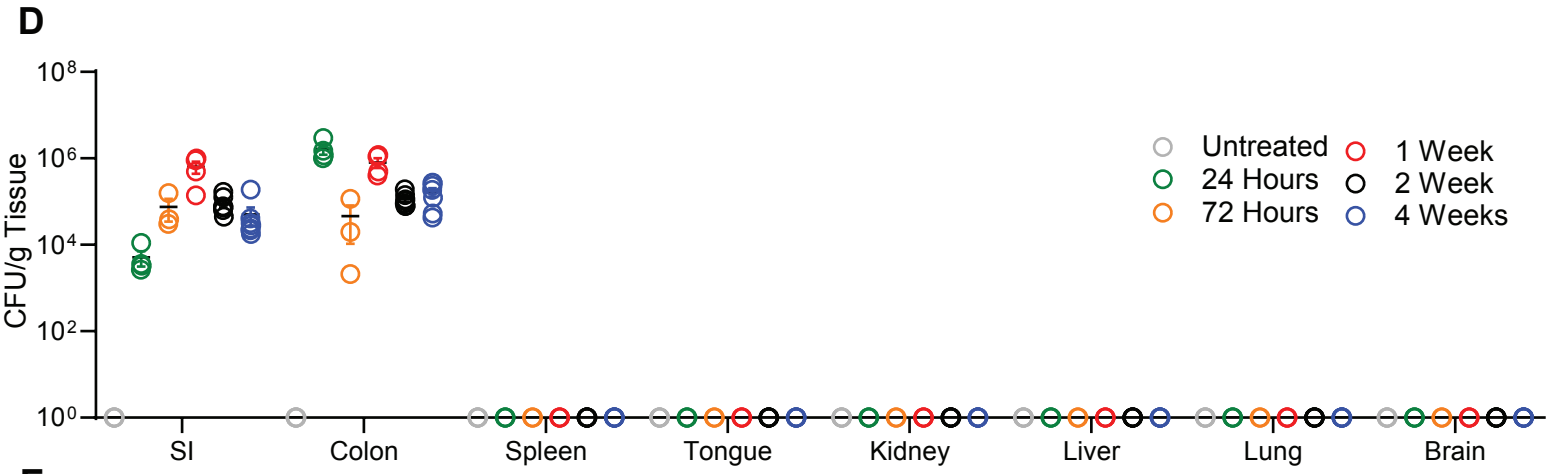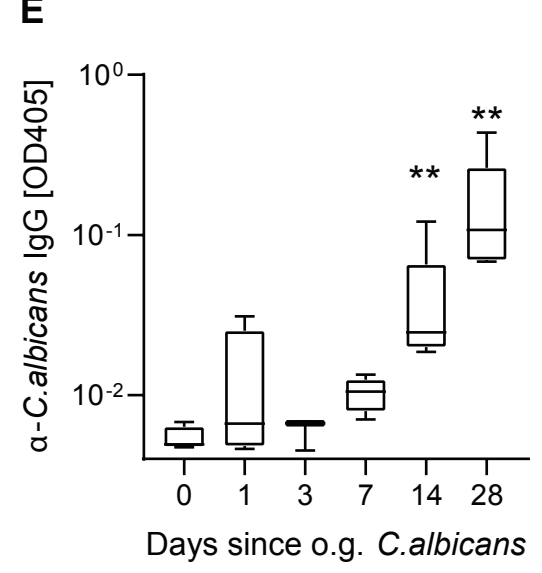

Supplement: NIHMS1664281-supplement-3.pdf [file NIHMS1664281-supplement-3.pdf]

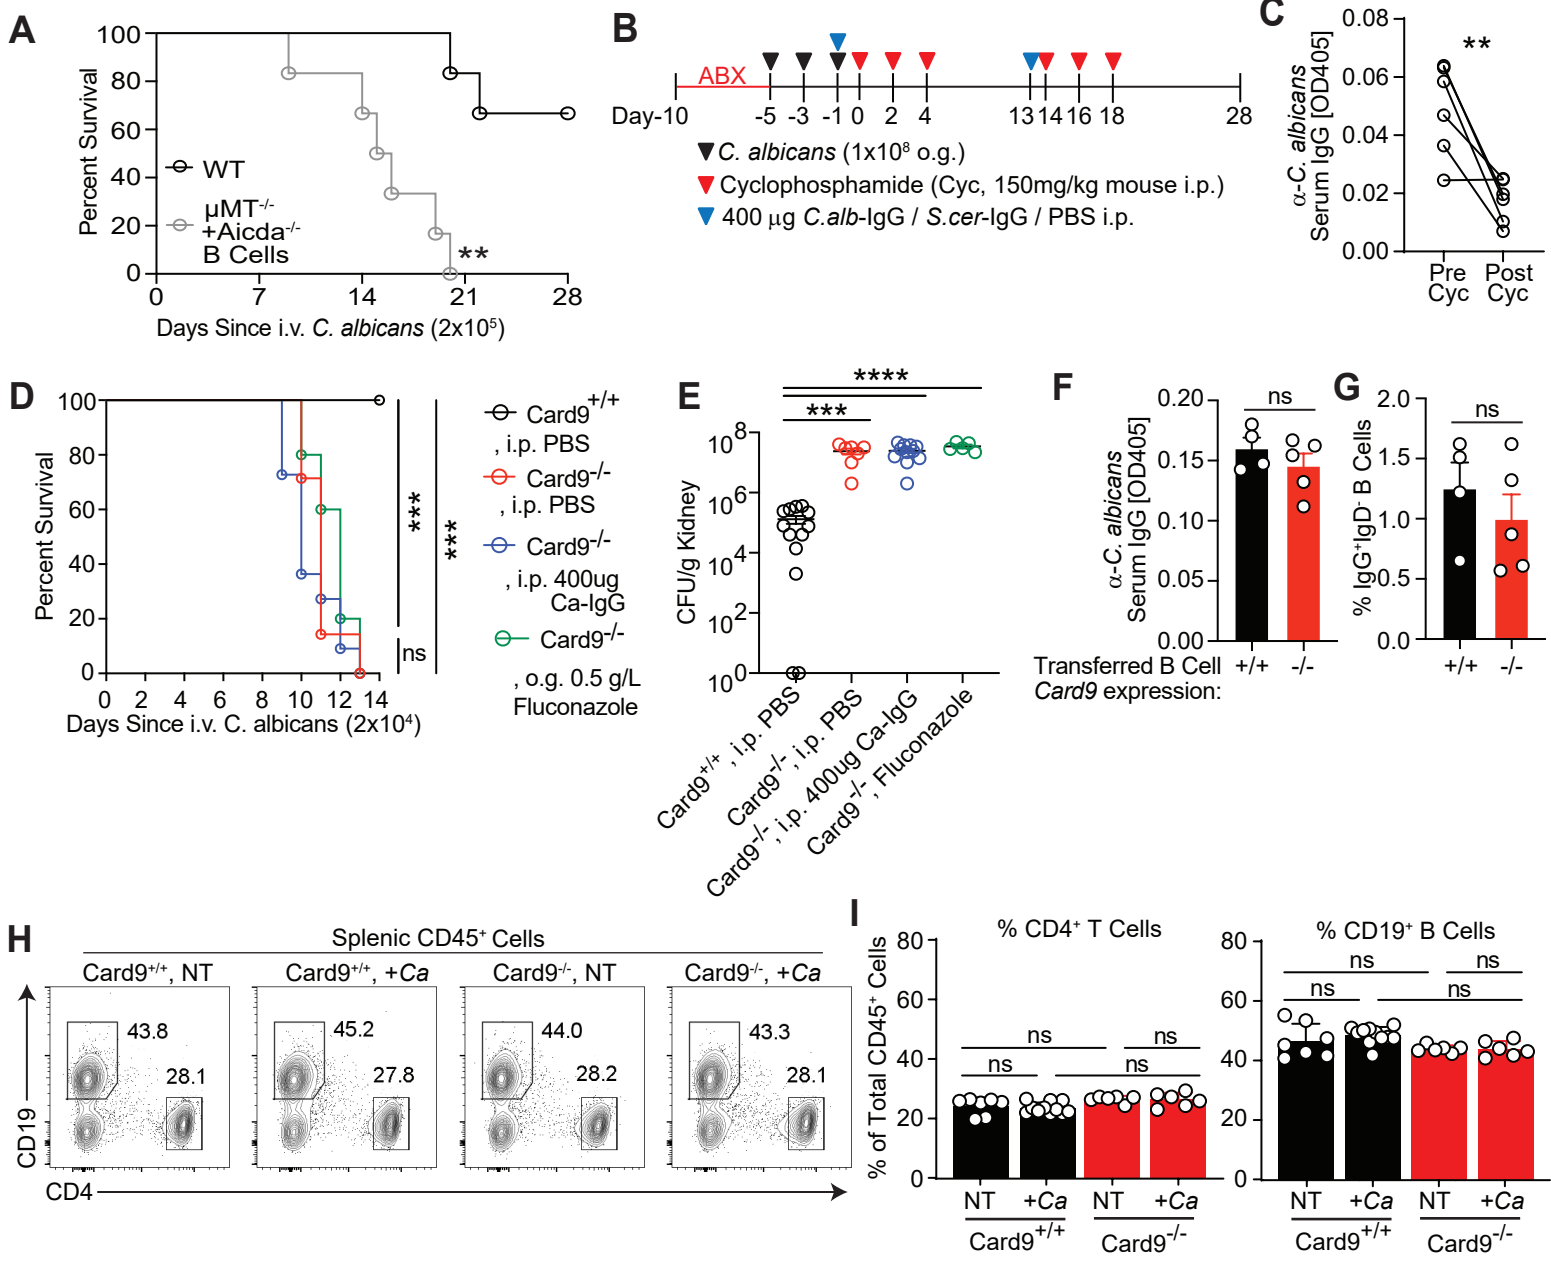

Supplement: NIHMS1664281-supplement-4.pdf [file NIHMS1664281-supplement-4.pdf]

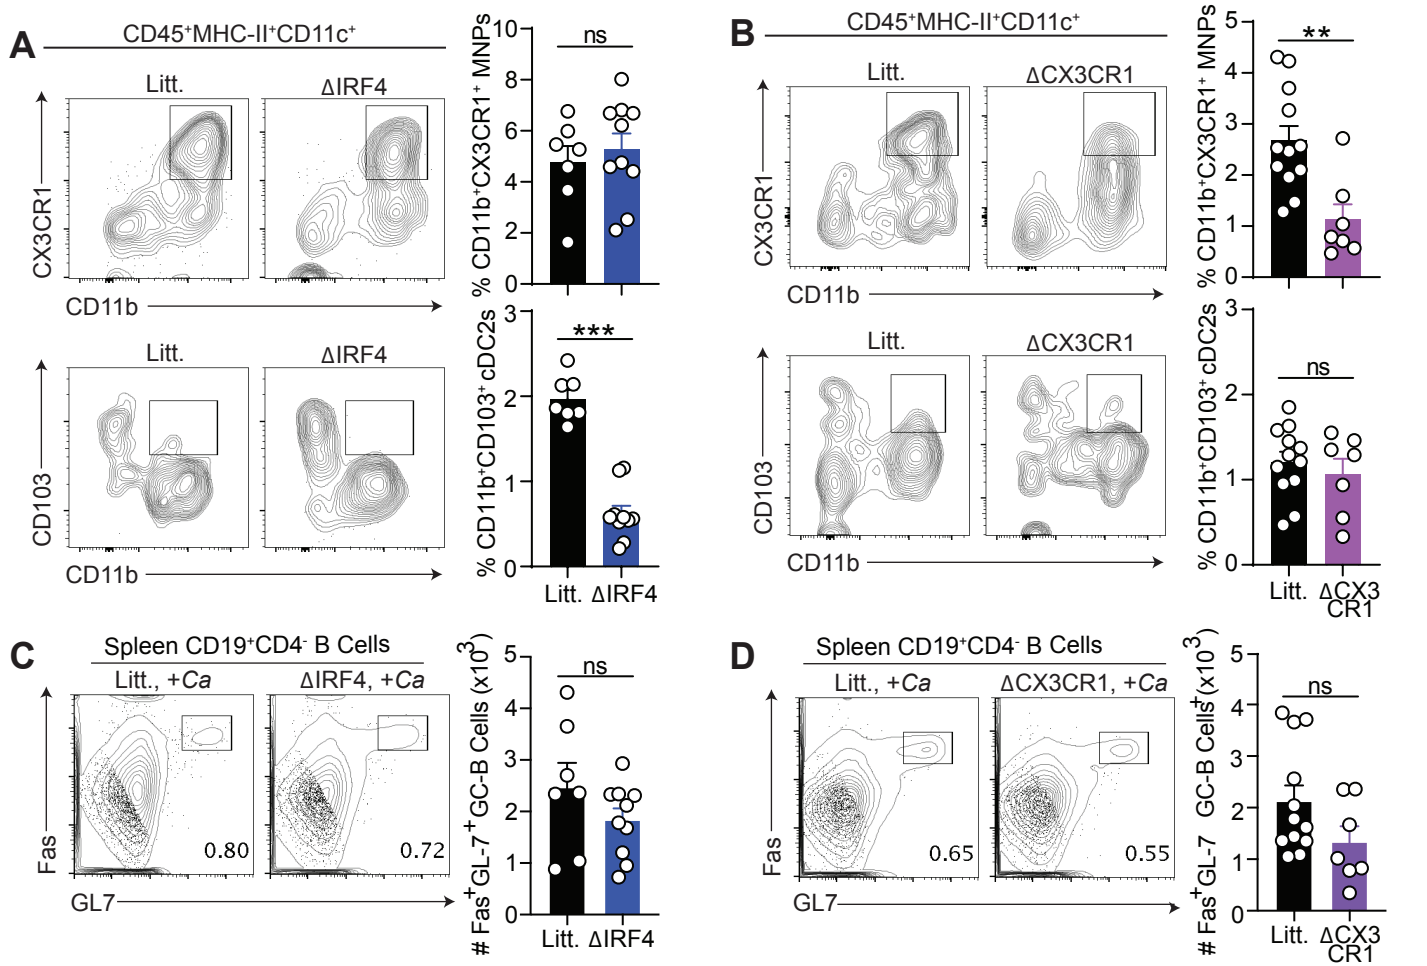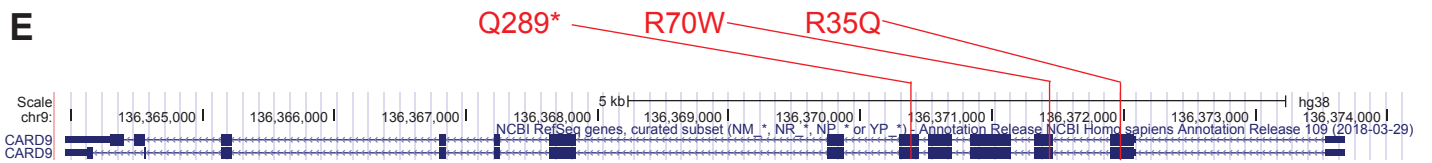

Supplement: NIHMS1664281-supplement-5.pdf [file NIHMS1664281-supplement-5.pdf]
